# Supplementary material
Source: publisher figshare collection journal article supplement (https://karger.figshare.com/ndownloader/files/38901207)
Supplement: Supplementary file 1 [file 38901207]

|  |  | **Severe TBI without prehospital deathsb,c** | | | **Severe TBIb,c** | | |
| --- | --- | --- | --- | --- | --- | --- | --- |
|  |  |  |  | |  |  | |
| **Variable** | **Number of person-years (x 1000)** | **No. of cases** | **Crude** | **Standardized** | **No. of cases** | **Crude** | **Standardized** |
|  |  |  | **IR (95% CI)** | **IR (95% CI)** |  | **IR (95% CI)** | **IR (95% CI)** |
| Overall | 5242.0 | 354 | 6.7 (6.0-7.4) | 5.9 (5.2-6.5) | 400 | 7.6 (6.9-8.4) | 6.7 (6.0-7.4) |
| Age, years |  |  |  |  |  |  |  |
| 17-19 | 269.2 | 31 | 11.5 (8.1-16.4) | NA | 37 | 13.7 (10.0-19.0) | NA |
| 20-24 | 441.0 | 35 | 7.9 (5.7-11.1) | NA | 41 | 9.3 (6.8-12.6) | NA |
| 25-29 | 410.7 | 21 | 5.1 (3.3-7.8) | NA | 21 | 5.1 (3.3-7.8) | NA |
| 30-39 | 883.8 | 26 | 2.8 (1.9-4.2) | NA | 30 | 3.4 (2.4-4.9) | NA |
| 40-49 | 929.9 | 35 | 3.8 (2.7-5.2) | NA | 39 | 4.2 (3.1-5.7) | NA |
| 50-59 | 867.6 | 33 | 3.8 (2.7-5.3) | NA | 43 | 5.0 (3.7-6.7) | NA |
| 60-69 | 687.4 | 40 | 5.8 (4.3-7.9) | NA | 49 | 7.1 (5.4-9.4) | NA |
| 70-79 | 426.7 | 49 | 11.5 (8.7-15.2) | NA | 52 | 12.2 (9.3-16.0) | NA |
| 80-89 | 273.6 | 59 | 21.6 (16.7-27.8) | NA | 62 | 22.7 (17.7-29.1) | NA |
| 90+ | 52.2 | 25 | 47.9 (32.4-70.9) | NA | 26 | 49.9 (33.9-73.2) | NA |
| Sex |  |  |  |  |  |  |  |
| Female | 2622.8 | 94 | 3.6 (2.9-4.4) | 2.6 (2.0-3.3) | 109 | 4.2 (3.4-5.0) | 3.1 (2.4-3.8) |
| Male | 2619.2 | 260 | 9.8 (8.6-11.0) | 9.2 (8.0-10.3) | 291 | 11.1 (9.9-12.5) | 10.4 (9.1-11.6) |
| Period |  |  |  |  |  |  |  |
| 2004-2009 | 2669.5 | 198 | 7.3 (6.3-8.4) | 6.8 (5.8-7.8) | 221 | 8.3 (7.3-9.4) | 7.8 (6.7-8.9) |
| 2010-2014 | 2572.4 | 156 | 6.1 (5.2-7.1) | 4.9 (4.1-5.8) | 179 | 7.0 (6.0-8.1) | 5.6 (4.7-6.5) |

Supplementary table 2: Crude and standardizeda incidence rates per 100 000 person-years, overall and by age, sex and 5-year period of severe traumatic brain injury with and without prehospital deaths.*

CI, Confidence interval. IR, incidence rate. NA, not applicable. TBI, traumatic brain injury.

*Analyses were performed by Stata/MP 17.0 for Windows version.

aAccording to the World Health Organization’s world standard population.

bSeverity of traumatic brain injury defined by lowest Glasgow coma scale score.

cIn two patients severity of TBI could not be identified.
